# Supplementary material for: A newly-constructed hydrolytically stable Co(ii) coordination polymer showing dual responsive fluorescence sensing of pH and Cu2+
Source: Royal Society of Chemistry journal article supplement (doi:10.1039/d1ce00404b), 2021-01-01
Supplement: d1ce00404b1.pdf [file d1ce00404b1.pdf]

## Single-crystal x-ray structure refinement

All non-hydrogen atoms were refined anisotropically. The hydrogen atoms on water were initially added through Fourier map and then refined with the restrained parameters: O-H = 0.85(1) Å, H...H = 1.39(1) Å and  $U_{\text{iso}}(\text{H}) = 1.5U_{\text{eq}}(\text{O})$ . The other H atoms were added in calculated positions and were refined with C-H = 0.93 Å (aromatic), N-H = 0.86 Å (amino) with  $U_{\text{iso}}(\text{H}) = 1.2U_{\text{eq}}(\text{C})$  for aromatic H atoms and  $U_{\text{iso}}(\text{H}) = 1.2U_{\text{eq}}(\text{N})$  for amino H atoms, respectively. Crystal data and structure refinement details are listed in **Table 1**.

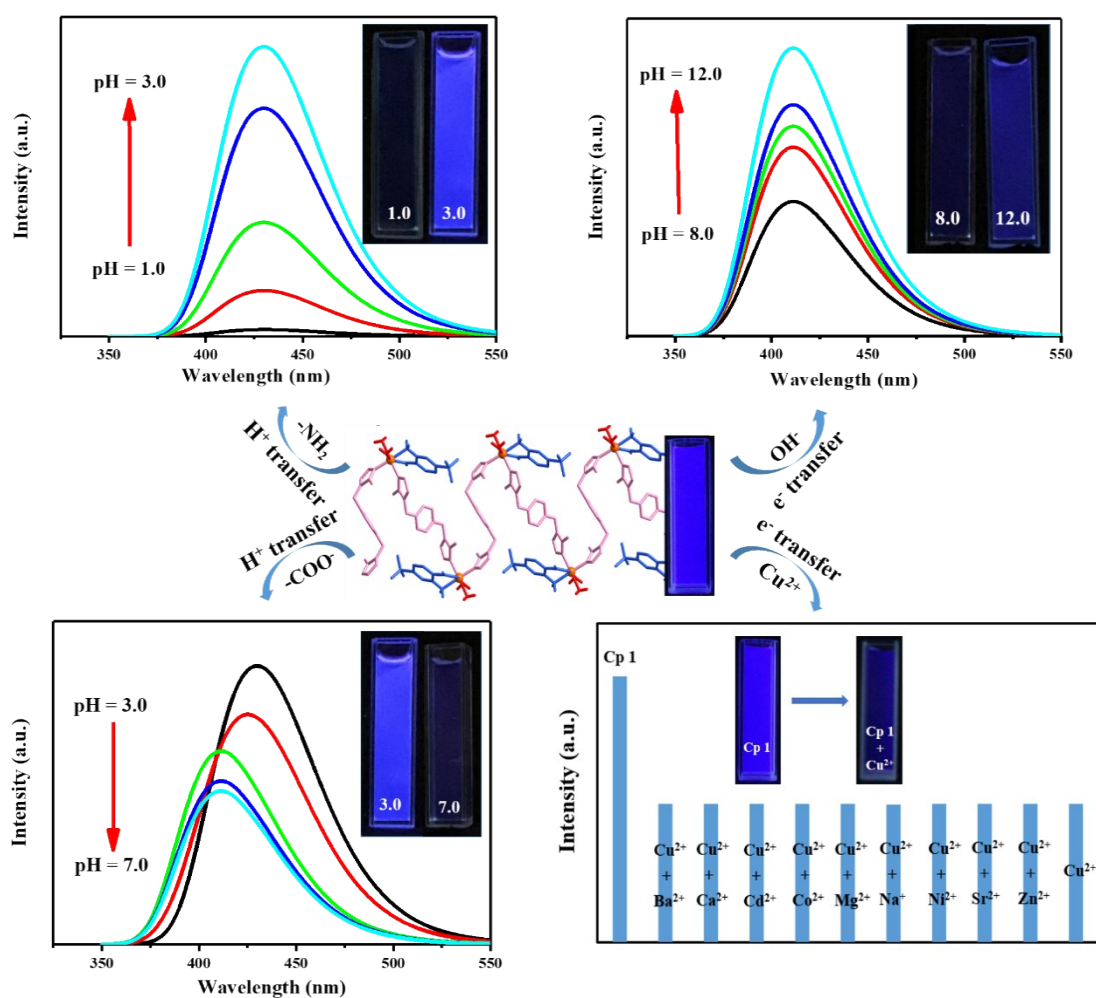

**Scheme S1** A novel CP-based fluorescent sensory material (**1**), showing distinct dual responsive fluorescence sensing to pH in three continuous stages as well as efficient and selective turn-off sensing to  $\text{Cu}^{2+}$ .

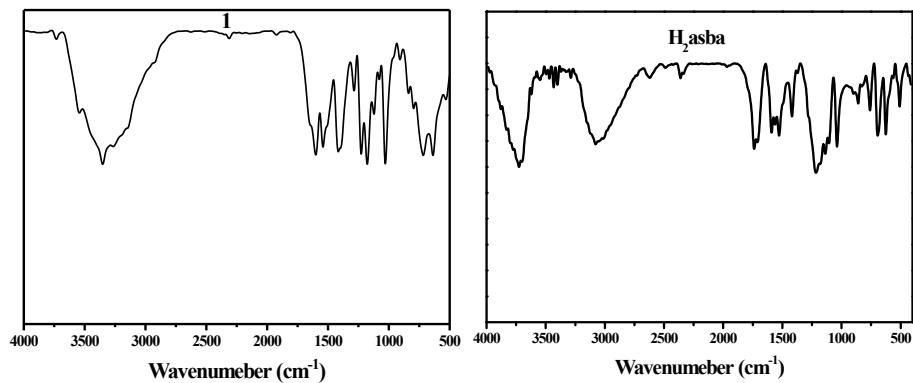

Figure S1 FT-IR spectrum of **1** and H<sub>2</sub>asba.

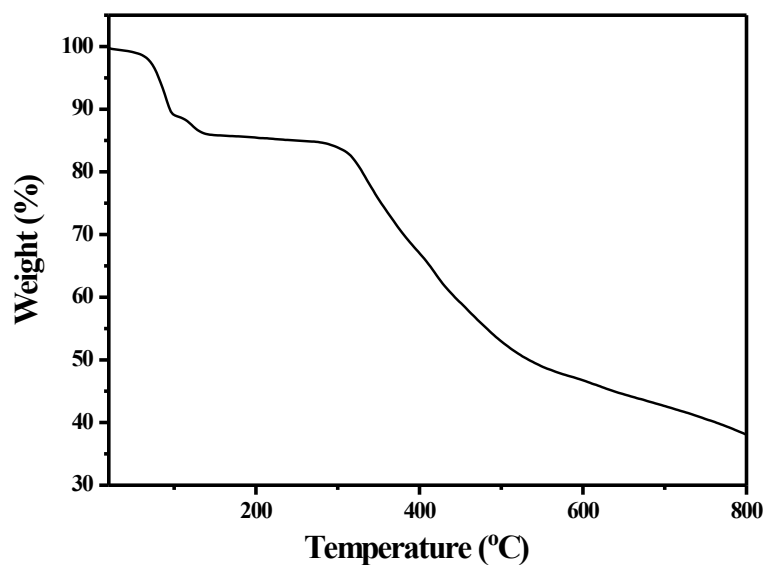

Figure S2 Thermogravimetric analysis (TGA) of **1**.

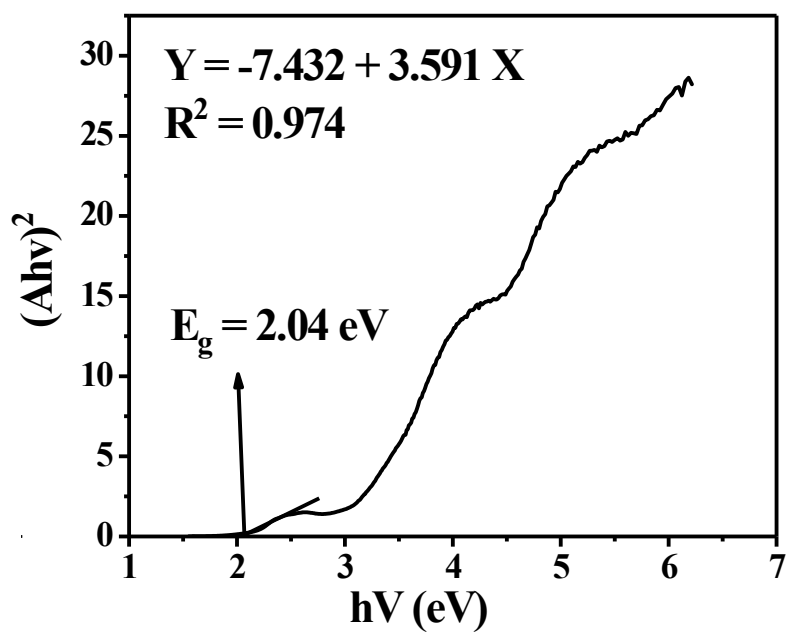

Figure S3 Solid-state diffuse reflectance UV-Vis-NIR spectrum of  $(Ah\nu)^2$  against  $h\nu$  (eV) for **1**.

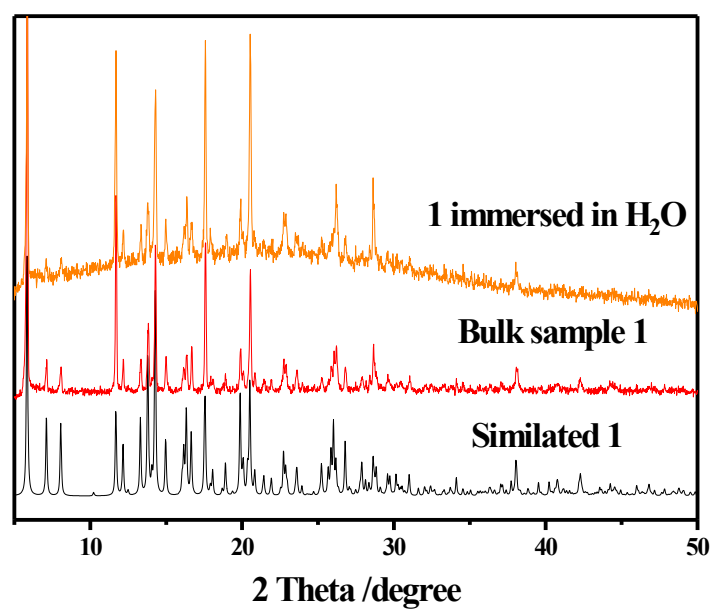

**Figure S4** PXRd patterns of **1**: the simulated XRD pattern calculated using Mercury (black), the as-synthesized bulk sample of **1** (red), the sample after being soaked in water for about three days (orange).

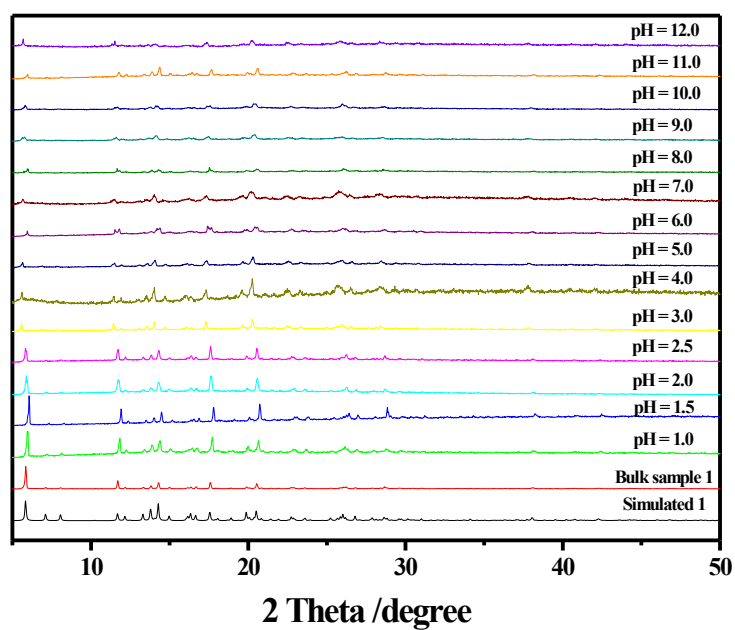

**Figure S5** PXRd patterns of the bulk sample of **1** and those after being soaked in different pH (1-12) aqueous solutions.

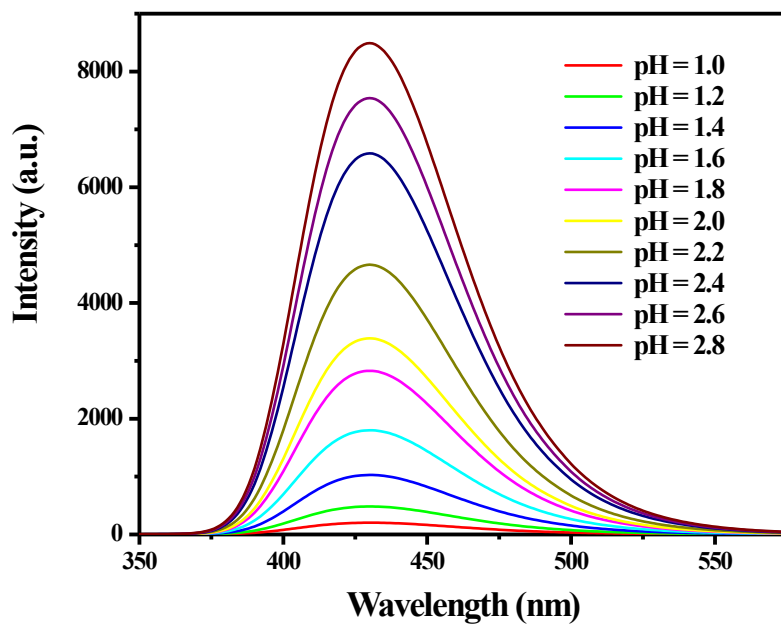

**Figure S6** The fluorescence emission spectra of the well-ground sample 1 suspended in the artificial gastric juice with different pH values determined by the traditional pH meter.

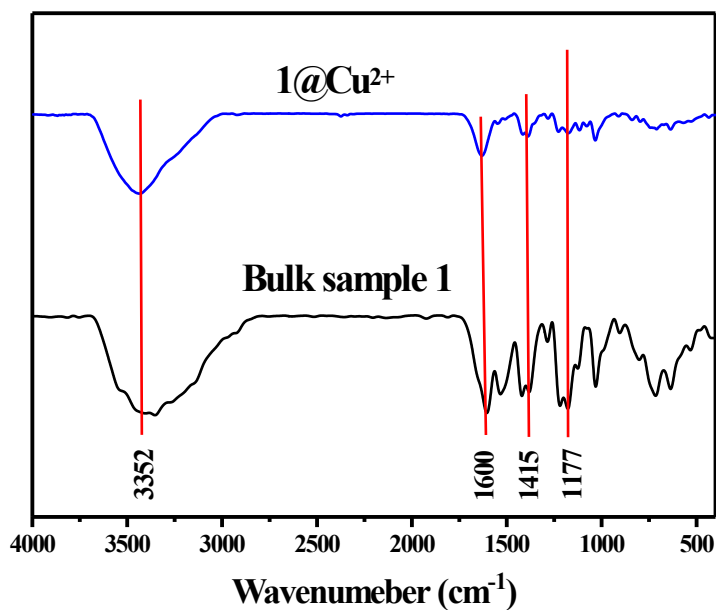

**Figure S7** FT-IR spectra of **1**: the bulk sample of **1** (black), and that after being soaked in the aqueous Cu<sup>2+</sup> solution for about three days (blue), respectively.

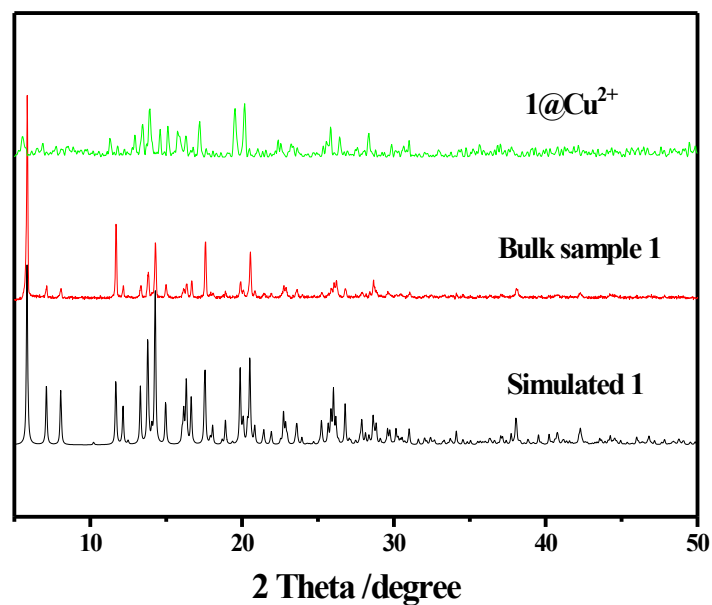

**Figure S8** PXRD patterns of **1**: the simulated XRD pattern (black), the bulk sample of **1** (red), and that after being soaked in the aqueous  $\text{Cu}^{2+}$  solution (green), respectively.

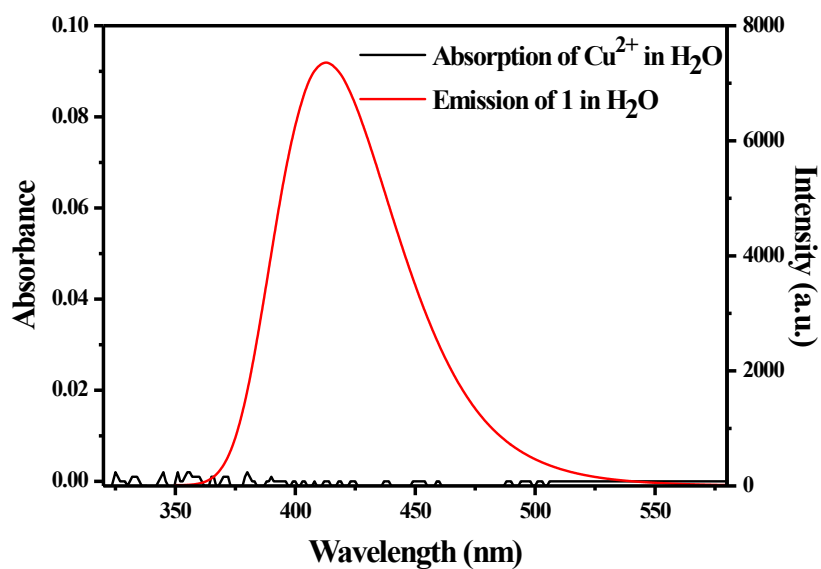

**Figure S9** The spectral overlap between the absorption spectrum of  $\text{Cu}^{2+}$  (0.75 mM) in water (black) and the fluorescence emission spectrum of the aqueous suspension of **1** (red) ( $\lambda_{\text{ex}} = 330$  nm).

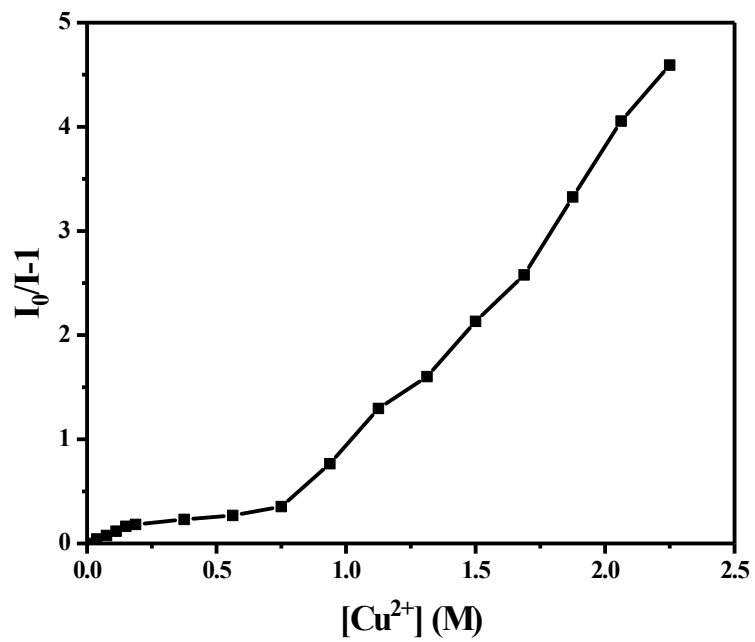

**Figure S10** The linear plot of  $I_0/I-1$  v.s. the concentration in the range of (0 - 2.25 mM).

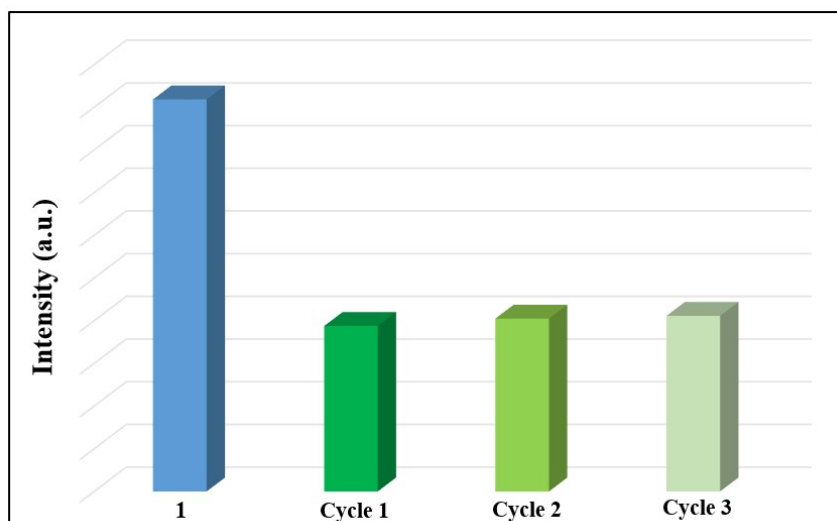

**Figure S11** The fluorescence emission intensity of the aqueous suspensions of **1** before and after the addition of  $\text{Cu}^{2+}$  (0.75 mM) during three cycles.

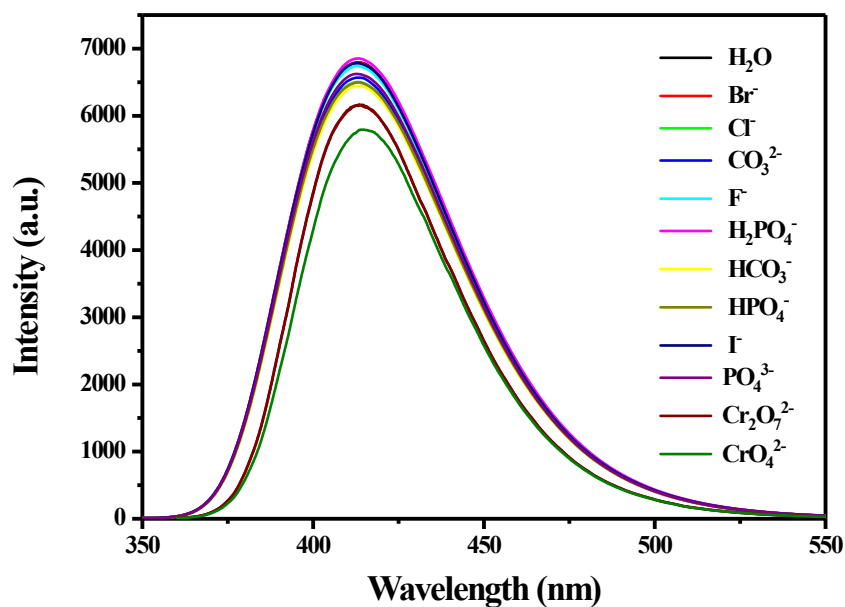

**Figure S12** Effect of the inorganic anions (0.75 mM) on the fluorescence emission of the aqueous suspension of **1**.

**Table S1** Selected geometric parameters (Å, °) for **1**.

|             |            |            |             |
|-------------|------------|------------|-------------|
| Co1—N4      | 2.083 (3)  | Co1—O4     | 2.090 (3)   |
| Co1—N2      | 2.115 (4)  | Co1—O5W    | 2.147 (3)   |
| Co1—N1      | 2.199 (4)  | Co1—O4W    | 2.082 (3)   |
| O4W—Co1—N4  | 94.58 (11) | O4—Co1—O5W | 85.18 (9)   |
| O4W—Co1—O4  | 167.59 (9) | N2—Co1—O5W | 176.82 (9)  |
| N4—Co1—O4   | 93.52 (11) | O4W—Co1—N1 | 92.63 (10)  |
| O4W—Co1—N2  | 91.80 (10) | N4—Co1—N1  | 171.33 (10) |
| N4—Co1—N2   | 93.36 (12) | O4—Co1—N1  | 78.60 (10)  |
| O4—Co1—N2   | 97.10 (10) | N2—Co1—N1  | 91.22 (12)  |
| O4W—Co1—O5W | 85.62 (9)  | O5W—Co1—N1 | 87.04 (11)  |
| N4—Co1—O5W  | 88.71 (10) |            |             |

**Table S2** Selected hydrogen-bond geometry (Å, °) for **1**.

| $D-H\cdots A$              | $D-H$ | $H\cdots A$ | $D\cdots A$ | $D-H\cdots A$ |
|----------------------------|-------|-------------|-------------|---------------|
| $O3W-H3WB\cdots O2^i$      | 0.85  | 2.09        | 2.925 (5)   | 168           |
| $O5W-H5WA\cdots O5^{ii}$   | 0.87  | 2.02        | 2.739 (4)   | 139           |
| $O3W-H3WA\cdots O1W^{ii}$  | 0.85  | 2.01        | 2.778 (4)   | 149           |
| $N1-H1A\cdots O5^{ii}$     | 0.89  | 2.29        | 3.141 (5)   | 160           |
| $O4W-H4WB\cdots O3W^{iii}$ | 0.87  | 1.85        | 2.675 (4)   | 160           |
| $O4W-H4WA\cdots O5^{iii}$  | 0.87  | 1.96        | 2.797 (4)   | 163           |
| $N1-H1B\cdots O5^{iii}$    | 0.89  | 2.21        | 3.067 (5)   | 161           |

Symmetry codes: (i)  $x+1, y-1, z$ ; (ii)  $-x+1, -y+1, -z$ ; (iii)  $x-1, y, z$ .

**Table S3** The relative fluorescence quantum yields of **1** in solvents.

| solvent          | $Q_x$  |
|------------------|--------|
| H <sub>2</sub> O | 0.1296 |
| DMF              | 0.0675 |
| THF              | 0.0017 |
| AT               | 0.0597 |
| MeOH             | 0.0111 |
| CF               | 0.0014 |
| EtOH             | 0.0048 |
| AN               | 0.0047 |
| IBA              | 0.0021 |
